# Supplementary material
Source: Research Square preprint supplement (doi:10.21203/rs.3.rs-10115028/v1)
Supplement: Supplementary file 1 [file ede1d6ad055fa3b775826a6d.docx]

SUPPLEMENTS


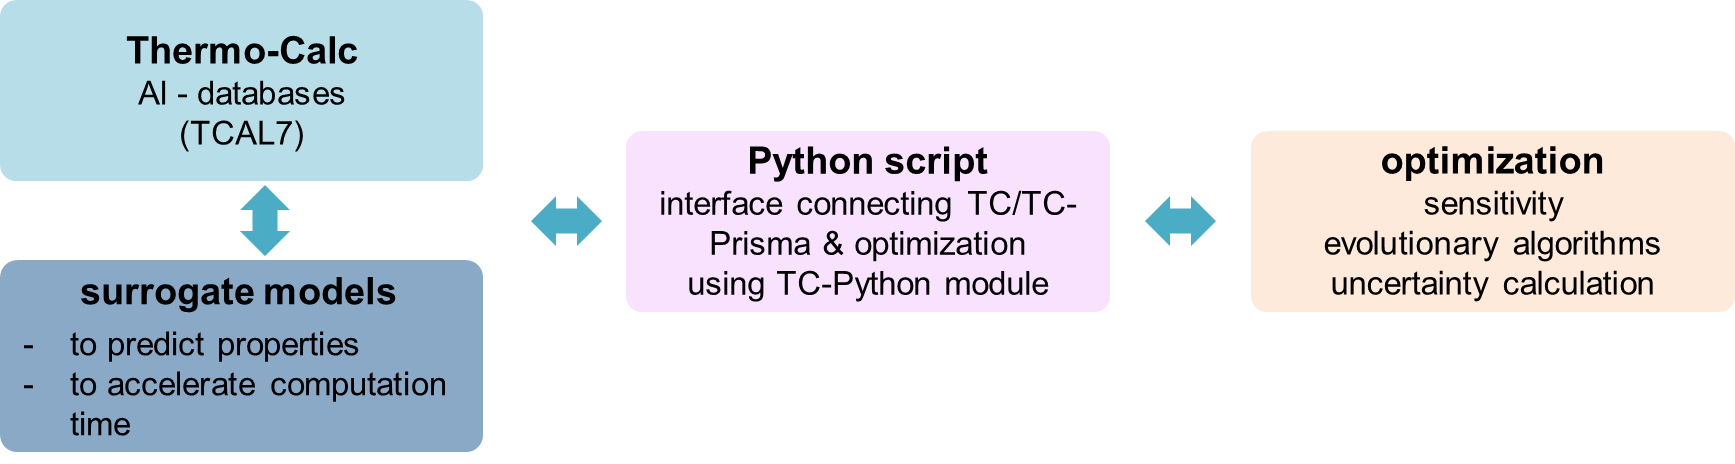


Fig. S1: General aapproach for high-throughput computational screening of alloys from scraps

| **Variable Description** |
| --- |
| | Al | Aluminum content after mixing scraps (in wt.%) | | --- | --- | | Si | Silicon content after mixing scraps (in wt.%) | | Cu | Copper content after mixing scraps (in wt.%) | | Ni | Nickel content after mixing scraps (in wt.%) | | Mg | Magnesium content after mixing scraps (in wt.%) | | Mn | Manganese content after mixing scraps (in wt.%) | | Fe | Iron content after mixing scraps (in wt.%) | | Cr | Chromium content after mixing scraps (in wt.%) | | Ti | Titanium content after mixing scraps (in wt.%) | | Zr | Zirconium content after mixing scraps (in wt.%) | | V | Vanadium content after mixing scraps (in wt.%) | | P | Phosphor content after mixing scraps (in wt.%) | | Vf_FCC_A1 | Volume fraction (in vol.%) of the -Al-matrix phase | | Vf_DIAMOND_A4 | Volume fraction (in vol.%) of the Si phase | | Vf_AL15SI2M4 | Volume fraction (in vol.%) of the Al15(Fe,Mn)3Si2 phase | | Vf_AL3X | Volume fraction (in vol.%) of the Al3(Ti,Zr) phase | | Vf_AL6MN | Volume fraction (in vol.%) of the Al6Mn phase | | Vf_ALP | Volume fraction (in vol.%) of the ALP phase | | Vf_AL3NI2 | Volume fraction (in vol.%) of the d-Al3(Cu,Ni)2 phase | | Vf_AL3NI_D011 | Volume fraction (in vol.%) of the e-Al3Ni phase | | Vf_AL7CU4NI | Volume fraction (in vol.%) of the p-Al7Cu4Ni phase | | Vf_AL2CU_C16 | Volume fraction (in vol.%) of the -Al2Cu phase | | Vf_Q_ALCUMGSI | Volume fraction (in vol.%) of the Q-Al5Si6Cu2Mg8 phase | | Vf_AL7CU2FE | Volume fraction (in vol.%) of the Al7Cu2Fe phase | | Vf_MG2SI_C1 | Volume fraction (in vol.%) of the Mg2Si phase | | Vf_AL9FE2SI2 | Volume fraction (in vol.%) of the β-Al5FeSi phase | | Vf_AL18FE2MG7SI10 | Volume fraction (in vol.%) of the π- Al8FeMg3Si6 phase | | eut. frac.[%] | fraction of eutectic after solidification (in %) | | eut. T (°C) | temperature of eutectic formation (in C) | | T_FCC_A1 | solidification temperature (in °C) of the -Al-matrix phase | | T_DIAMOND_A4 | solidification temperature (in °C) of the Si phase | | T_AL15SI2M4 | solidification temperature (in °C) of the Al15(Fe,Mn)3Si2 phase | | T_AL3X | solidification temperature (in °C) of the Al3(Ti,Zr) phase | | T_AL6MN | solidification temperature (in °C) of the Al6Mn phase | | T_ALP | solidification temperature (in °C) of the ALP phase | | T_AL3NI2 | solidification temperature (in °C) of the -Al3(Cu,Ni)2 phase | | T_AL3NI_D011 | solidification temperature (in °C) of the -Al3Ni phase | | T_AL7CU4NI | solidification temperature (in °C) of the -Al7Cu4Ni phase | | T_AL2CU_C16 | solidification temperature (in °C) of the -Al2Cu phase | | T_Q_ALCUMGSI | solidification temperature (in °C) of the Q-Al5Si6Cu2Mg8 phase | | T_AL7CU2FE | solidification temperature (in °C) of the Al7Cu2Fe phase | | T_MG2SI_C1 | solidification temperature (in °C) of the Mg2Si phase | | T_AL9FE2SI2 | solidification temperature (in °C) of the β-Al5FeSi phase | | T_AL18FE2MG7SI10 | solidification temperature (in °C) of the π- Al8FeMg3Si6 phase | | T(liqu) | liquidus temperature (in °C) | | T(sol) | solidus temperature (in °C) | | delta_T | Solidification interval (T(liqu) – T(sol), in °C) | | delta_T_FCC | Solidification interval (T_FCC_A1 – T(sol), in °C) | | delta_T_Al15Si2M4 | Solidification interval (T_Al15Si2M4 – T(sol), in °C)– T(sol), in °C) | | delta_T_Si | Solidification interval (T_DIAMOND_A4 – T(sol), in °C) | | CSC | hot crack susciptability coefficient | | YS(MPa) | total yield strength (in MPa) | | Hardness (Vickers) | total hardness (in Vickers) | | CTEvol (1/K)(20.0-300.0°C) | volumetric thermal expansion coefficient (in 1/K, temperature range 20 - 300°C) | | Density(g/cm3) | alloy density (in g/cm³) | | Volume(m3/mol) | system volume (in m³/mol) | | El.conductivity(S/m) | electrical conductivity (in S/m) | | El. Resistivity (ohm m) | electrical resistivity (in ohm*m) | | heat capacity (J/(mol K)) | heat capacity (in J/(mol*K)) | | Therm.conductivity (W/(mK)) | thermal conductivity (in W/(mK)) | | Therm. Diffusivity (m2/s) | thermal diffusivity (in m²/s) | | Therm.resistivity (mK/W) | thermal resistivity (in mK/W) | | Linear thermal expansion (1/K)(20.0-300.0°C) | linear thermal expansion coefficient (in 1/K, temperature range 20 - 300°C) | | Technical thermal expansion (1/K)(20.0-300.0°C) | technical thermal expansion coefficient (in 1/K, temperature range 20 - 300°C) | |

Table S1: Output variables from Thermo-Calc calculations


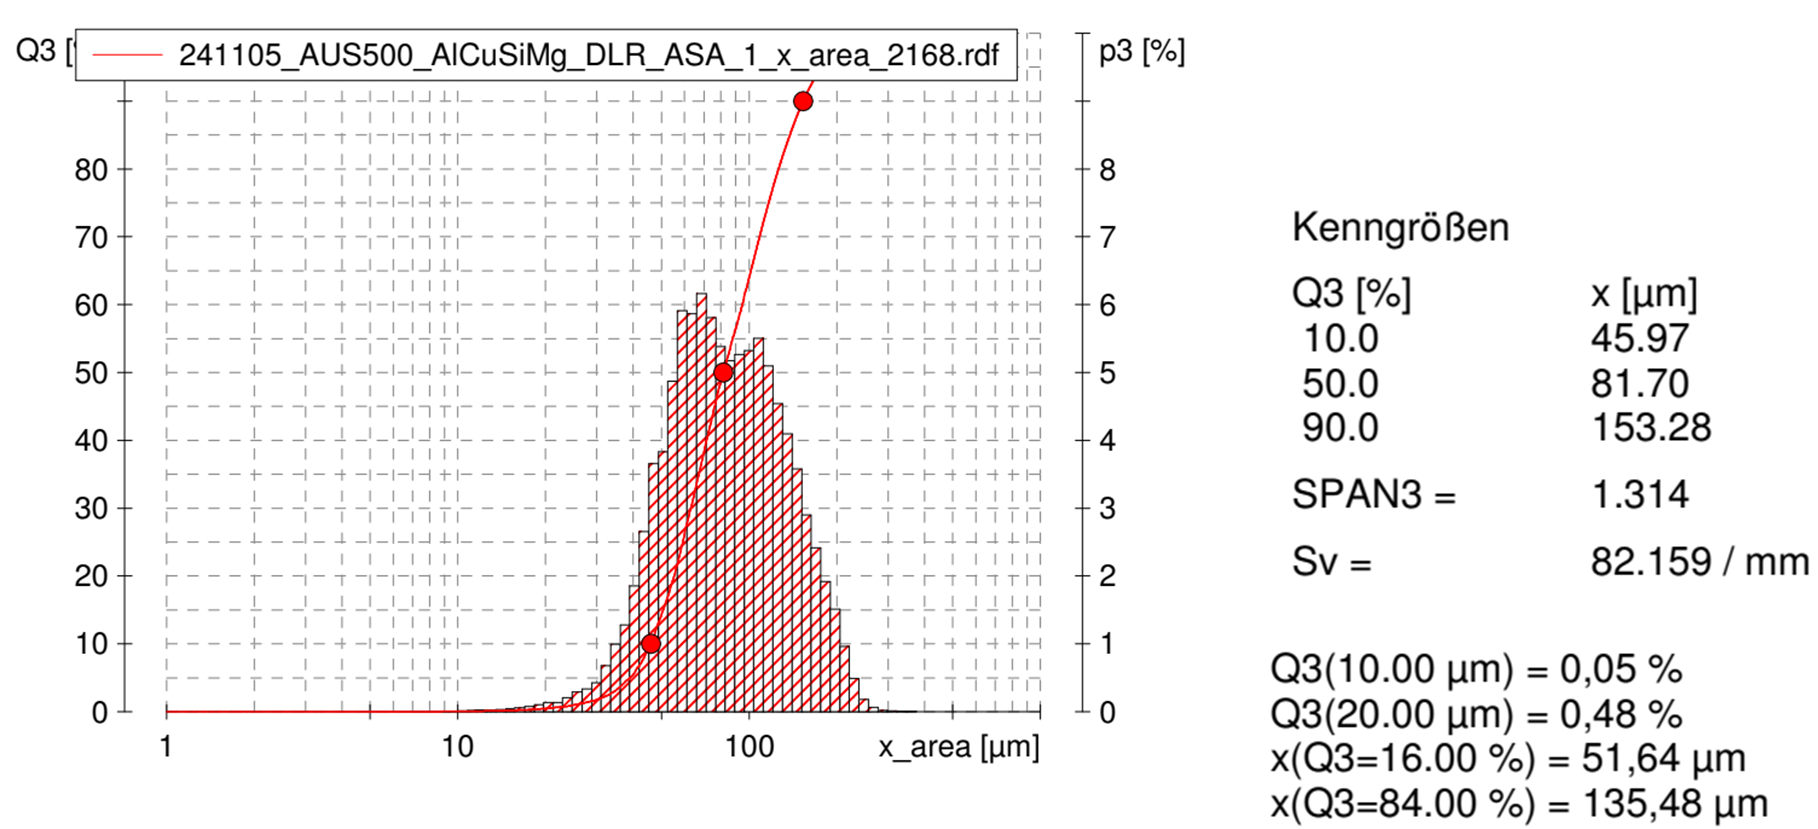


Fig. S2: Grain size analysis of the atomized scrap mixture for in-situ LPBF experiments


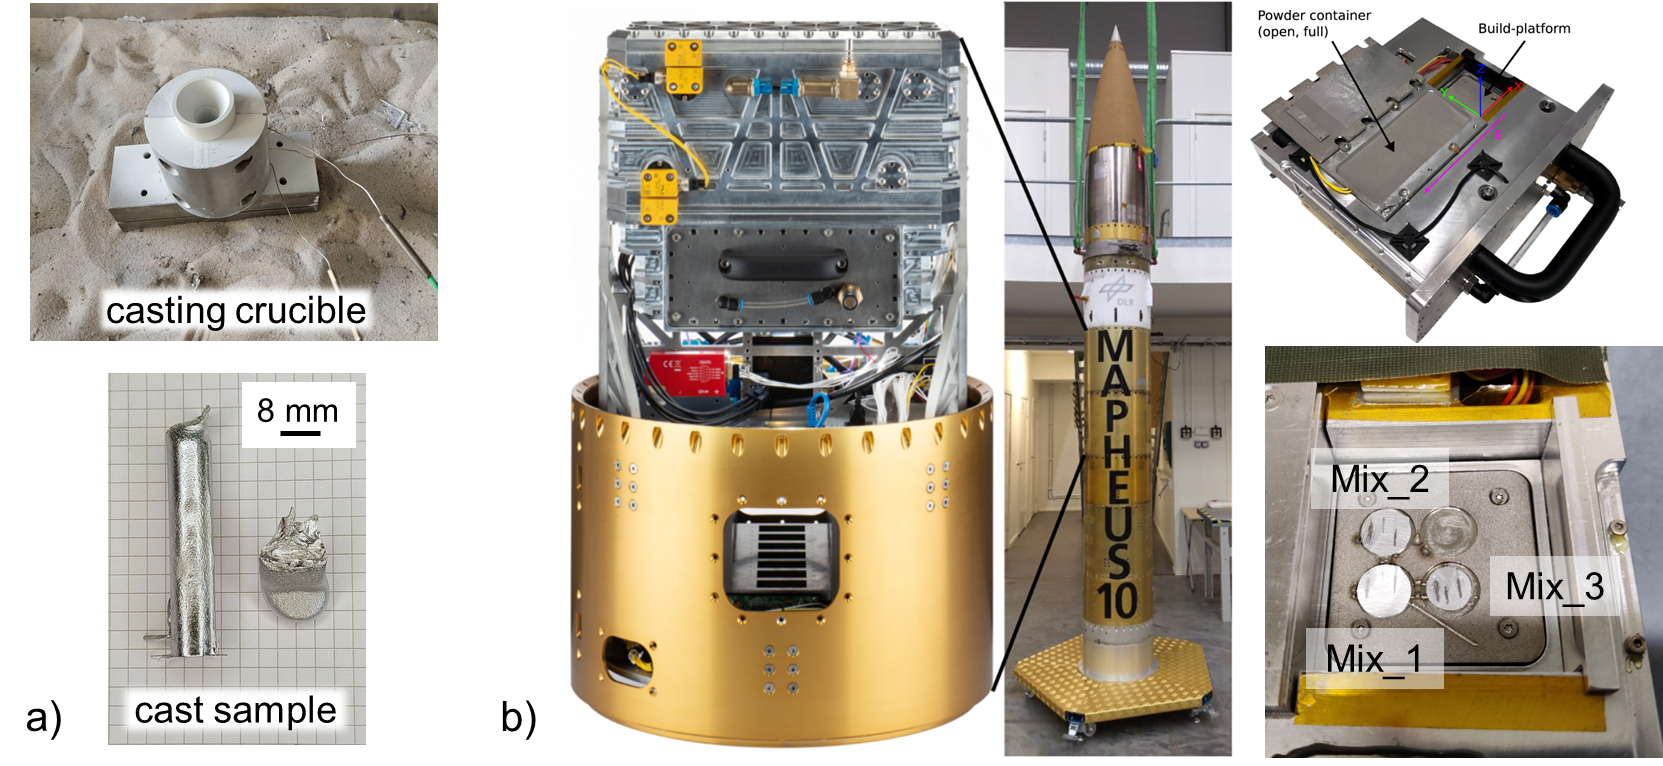


Fig. S3: a) casting crucible for sample production and cast sample, b) used LPBF machine (MARS-M) for laser line scan experiments and preliminary LPBF tests.


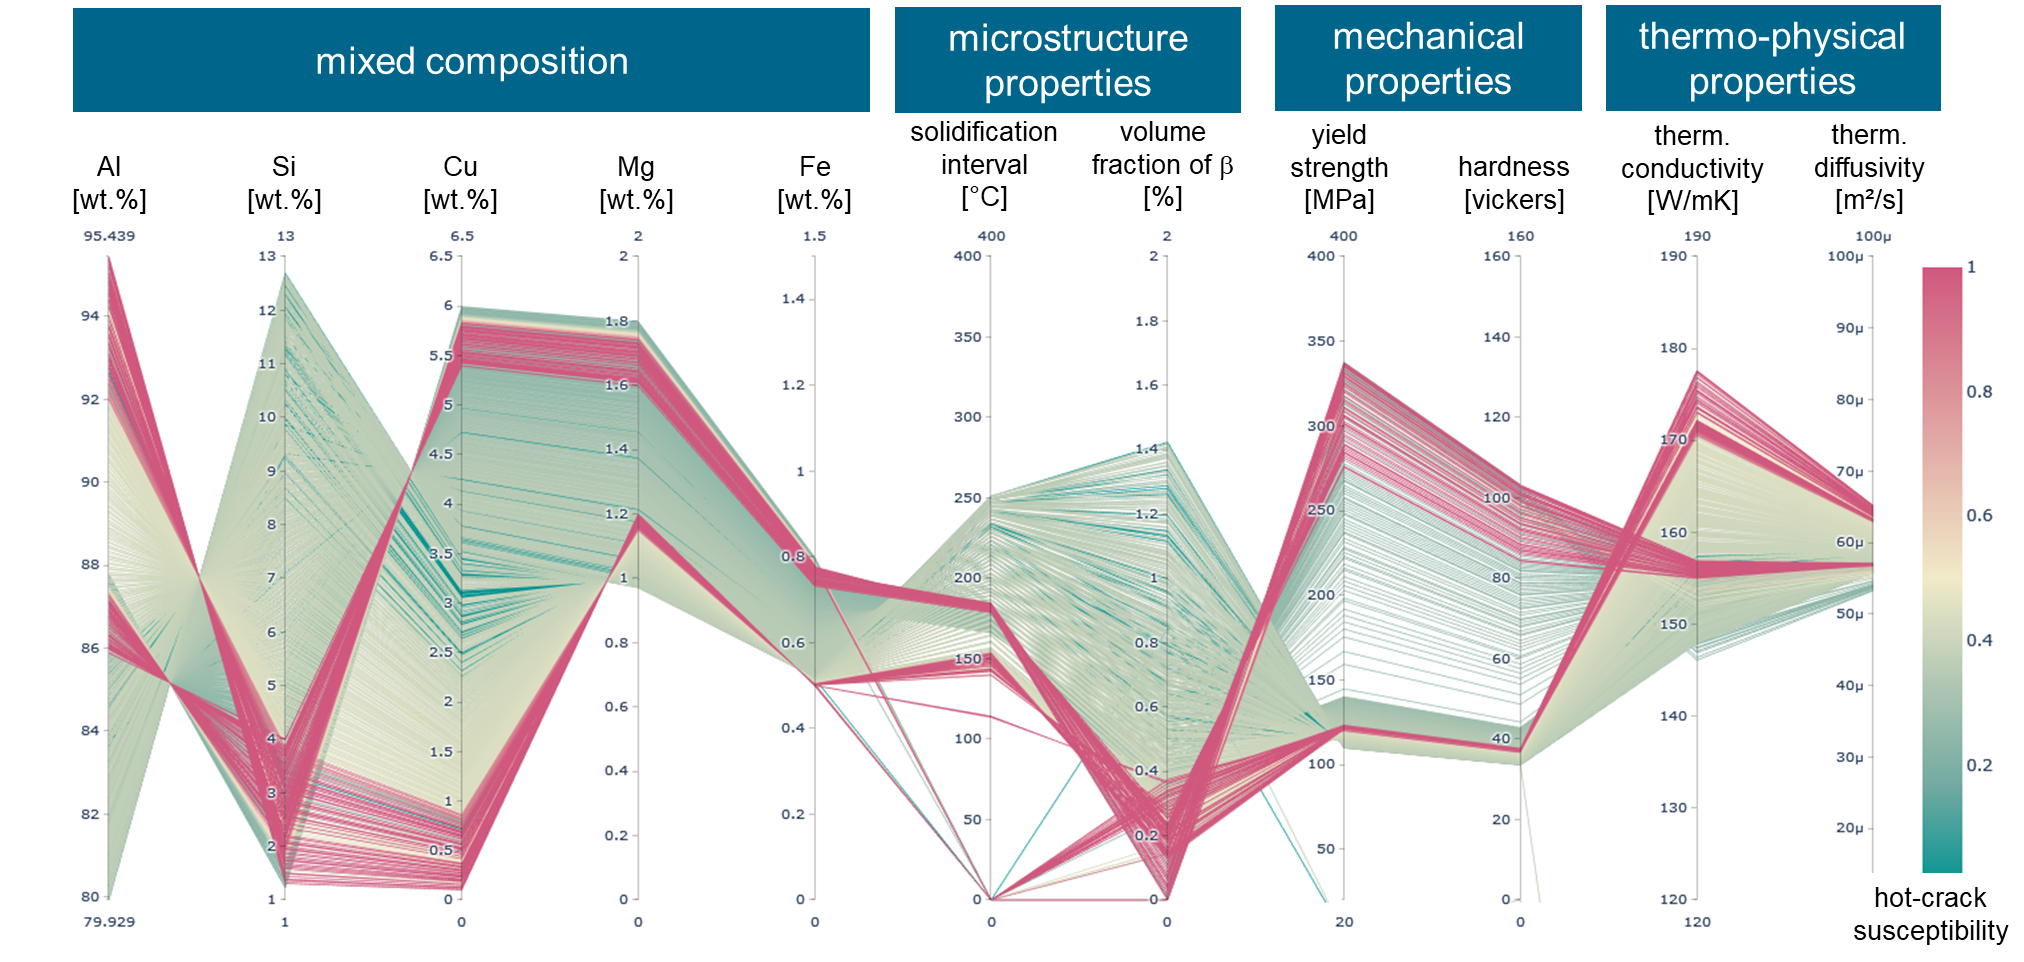


Fig. S4: Parallel coordinates plot showing representatively the information that can be gained from high-throughput thermodynamic calculations (on the example of ~ 1500 designs).

Fig. S4 shows selected input and output parameters for ~1500 designs in the form of a parallel plot where each line indicates one alloy design. This illustrates what kind of information can be gained from the conducted calculations, i.e. the chemical composition after mixing different scraps, microstructure properties, mechanical properties and thermo-physical properties.


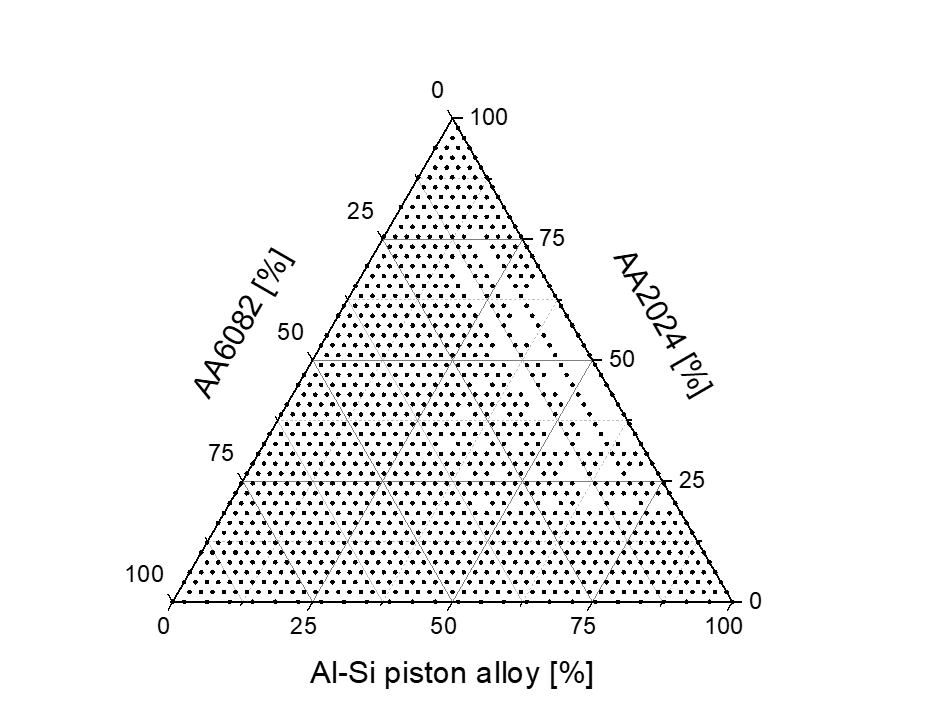


Fig. S5: Training dataset for the Random Forest surrogate model: ternary mixtures (Al-Si piston alloy + AA2024 + AA6082; 760 existing data points)


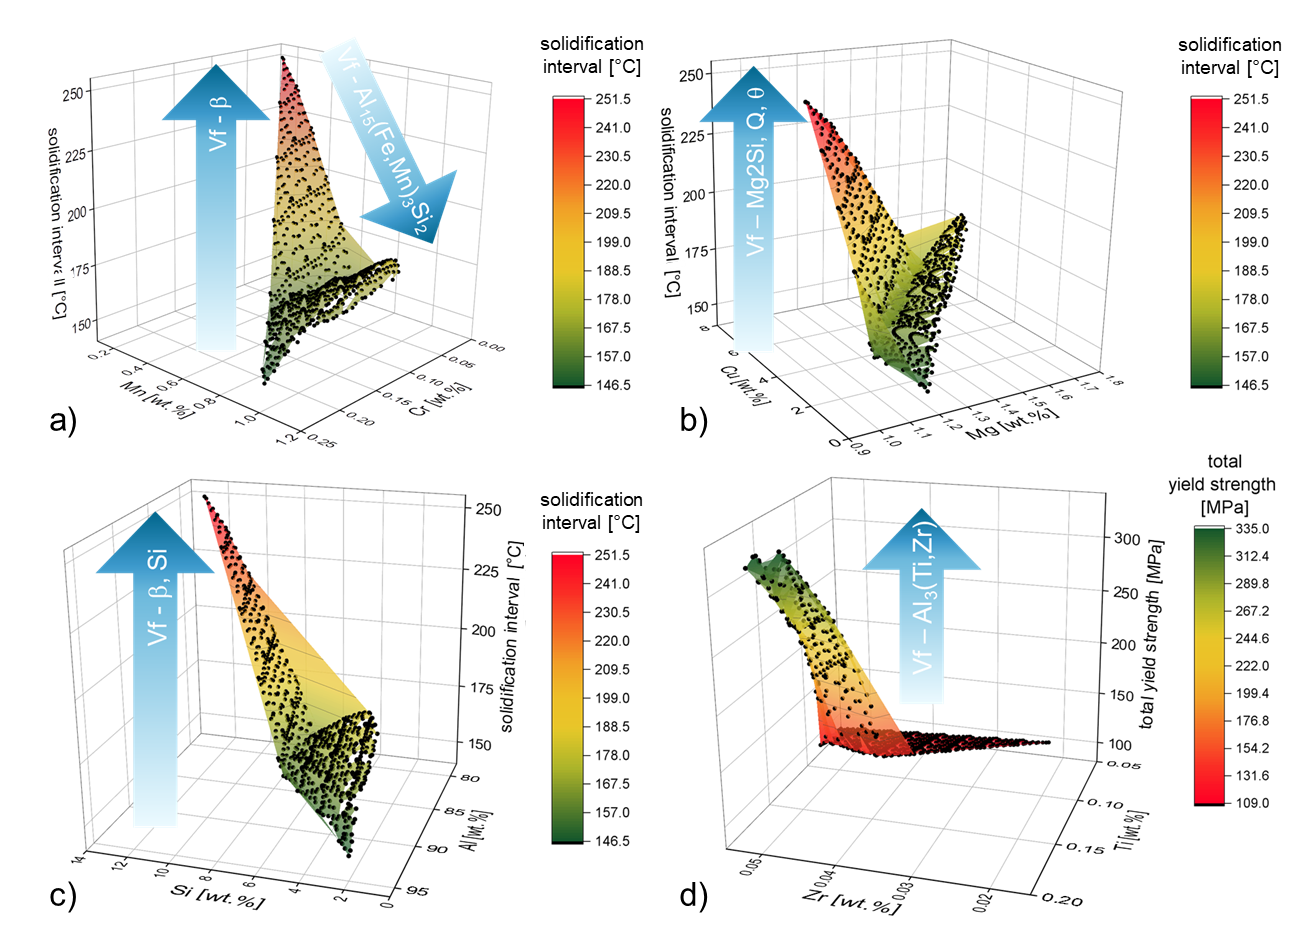


Fig. S7: Additional 3D sensitivity plots showing the influence of elements on phase volume fractions and relevant calculated alloy properties.


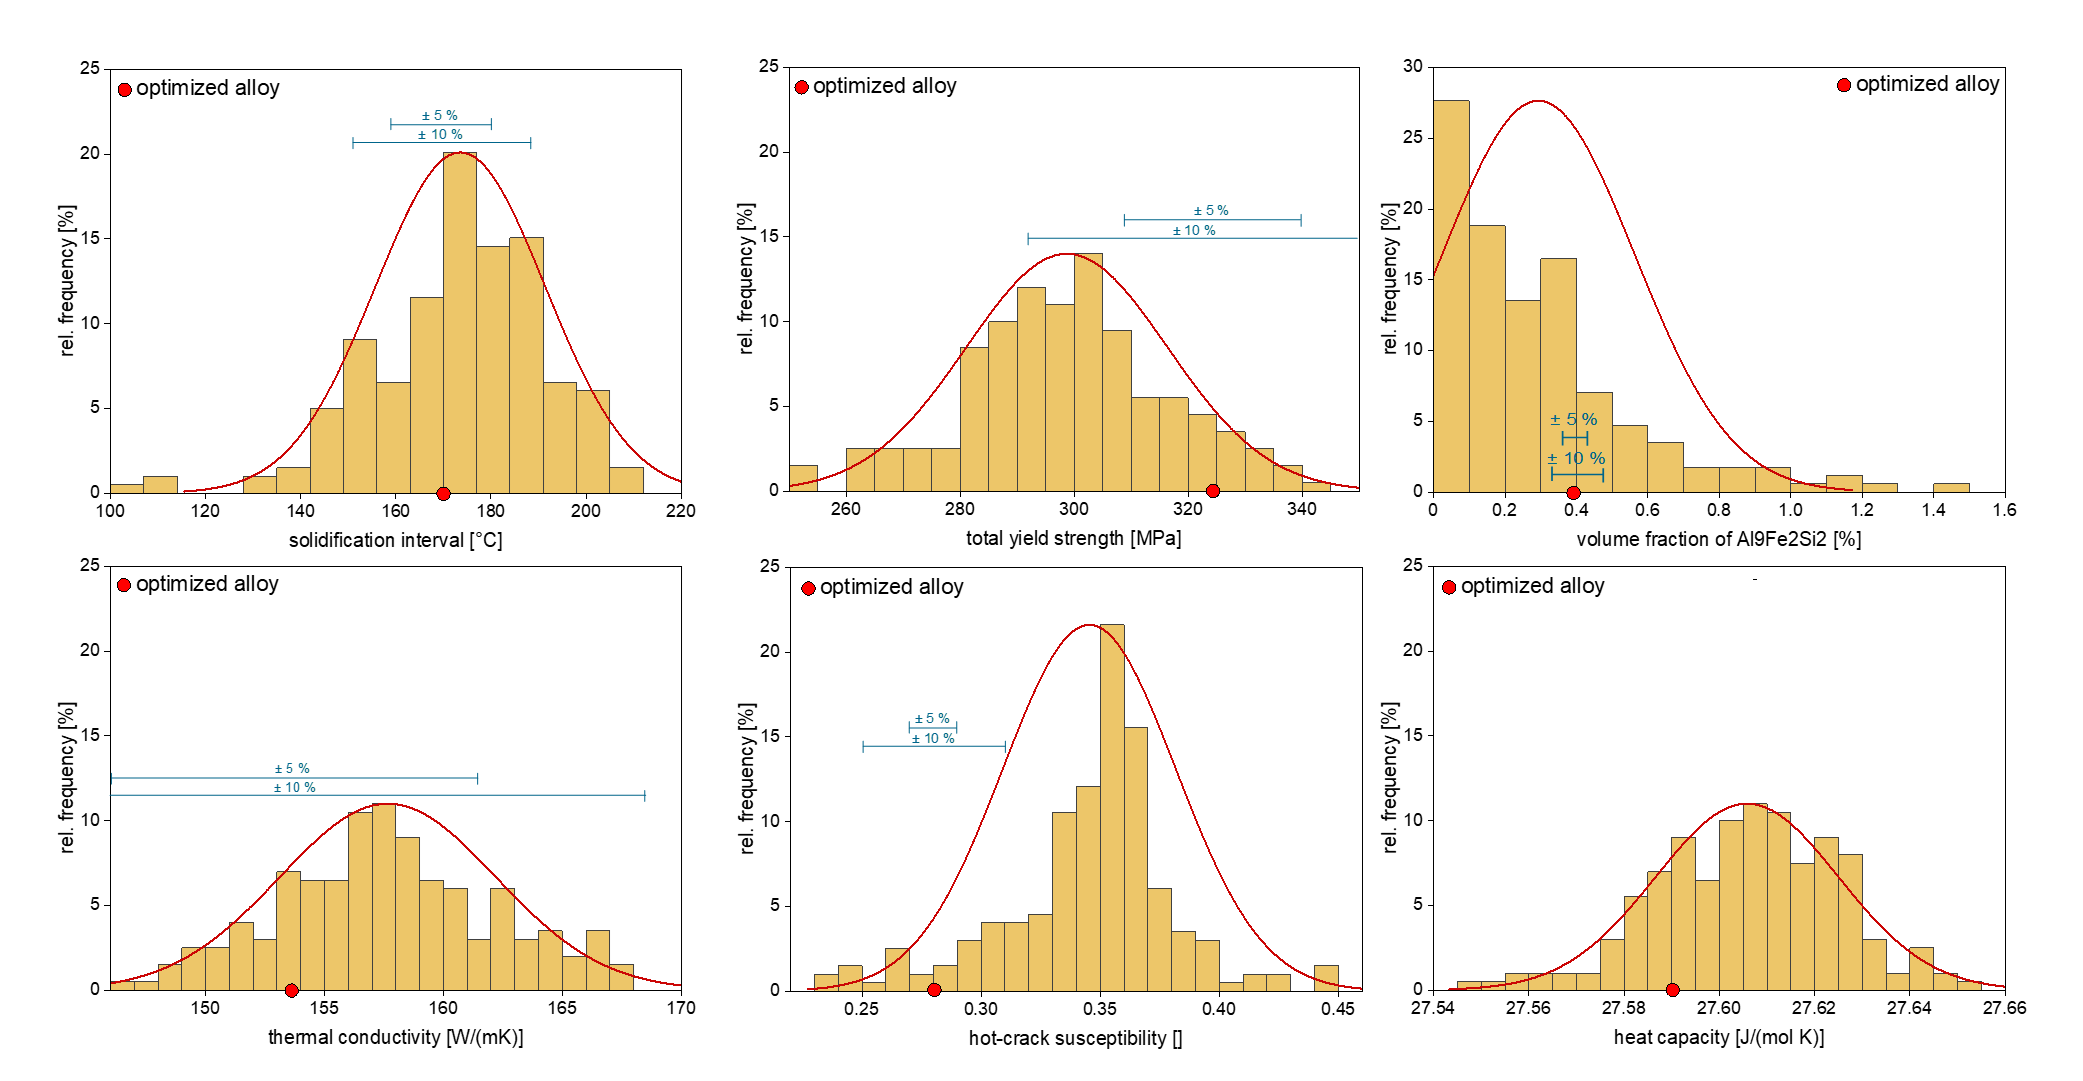


Fig. S8: Uncertainty histograms for the most relevant alloy properties within the defined element ranges in Fig. 8.

| Phases identified in Mix1, Mix2 or Mix3 | Space group no. | Other names | Thermo-Calc designation |
| --- | --- | --- | --- |
| Al | 225 |  | FCC_A1 |
| Si | 227 |  | DIAMOND_A4 |
| Mg2Si | 225 |  | MG2SI_C1 |
| Al2Cu | 140 |  | AL2CU_C16 |
| Al17.1Fe3.2Mn0.8Si1.9 * | 204 | Al19(Fe,Mn)5Si2 | AL15SI2M4 |
| Al9FeMg3Si5 | 189 | Al8FeMg3Si6 | AL18FE2MG7SI10 |
| Al4Cu2Mg8Si7 | 174 | Al5Cu2Mg8Si6 | Q_ALCUMGSI |
| Al3FeSi2 | 140 |  | ALFESI_T4 |
| Al2CuNi | 221 |  |  |
| Al-Ni-Cu rich phase | ? |  |  |

* The phases Al17.1Fe3.2Mn0.8Si2 (space group 204) and Al15(Fe,Mn)3Si2 (space group 200) with more than 130 atoms in the unit cell are very similar and cannot be easily distinguished from one another.

Table S2: Phase names, space group number and other common names of the phases identified in the as-cast alloy samples Mix-1, Mix-2 and Mix3 and the Thermo-Calc designations that most likely correspond to them.


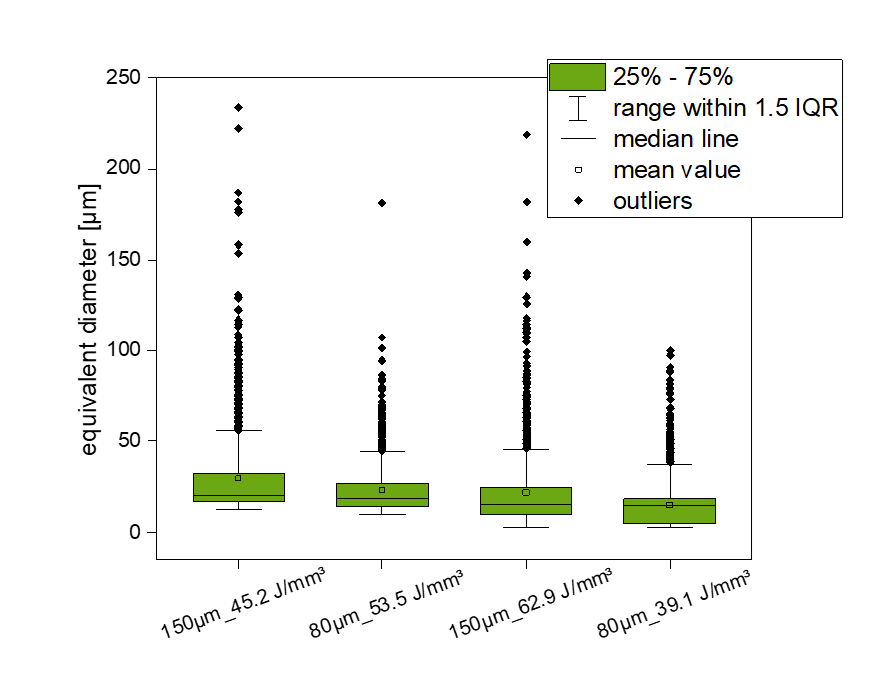


Fig. S9: Quantitative evaluation of the equivalent diameter of defects for the optimized alloy Mix-2 (AlSi5Ni0.7Cu4.4Mg1.5Fe0.5) comparing different print conditions.
